# Supplementary material for: Independent Risk Factors for RBC Transfusion in Children Undergoing Surgery. Analysis of 14,248 Cases at a German University Hospital
Source: MDPI journal article supplement (doi:10.3390/children8080634), 2021-07-25
Supplement: s1 [file s1]

## Supplement

**Table S1.** Surgical specialties (OPS Codes)

| Number | Surgery groups                                        | OPS codes                                                 |
|--------|-------------------------------------------------------|-----------------------------------------------------------|
| 0      | Dermatology, Ophthalmology, Unspecific                | Only 5-08 to 5-16, 5-89 to 5-99                           |
| 1      | Neurosurgery                                          | Only 5-01 to 5-05*                                        |
| 2      | Otorhinolaryngology                                   | Only 5-18 to 5-31*                                        |
| 3      | Thoracic surgery                                      | Only 5-32 to 5-34*                                        |
| 4      | Cardiac surgery                                       | Only 5-35 to 5-37*                                        |
| 5      | Vascular surgery                                      | Only 5-38 to 5-39*                                        |
| 6      | Visceral and endocrine surgery                        | Only 5-06 to 5-07, 5-42 to 5-45*                          |
| 7      | Urology                                               | Only 5-55 to 5-64*                                        |
| 8      | Gynaecology                                           | Only 5-65 to 5-71, 5-87 to 5-88*                          |
| 9      | Obstetric                                             | Only 5-72 to 5-75*                                        |
| 10     | Oral-maxillofacial surgery                            | Only 5-76 to 5-77*                                        |
| 11     | Trauma and orthopaedic surgery                        | Only 5-78 to 5-86*                                        |
| 12     | Operations on the haematopoietic and lymphatic system | Only 5-40 to 5-41*                                        |
| 13     | Mixed                                                 | OPS from at least two different Surgery specialties 1–12* |

\* The surgery groups 1–13 may also contain in addition OPS from the surgery group 0.

**Table S2.** Coding of the postoperative complications (ICD-Codes)

| <b>Complications</b>              | <b>ICD codes</b>                                                                                                                                                                                                                         |
|-----------------------------------|------------------------------------------------------------------------------------------------------------------------------------------------------------------------------------------------------------------------------------------|
| <b>Cardiovascular dysfunction</b> | I21 I21.0 I21.1 I21.2 I21.3 I21.4 I21.9 I22 I22.0 I22.1 I22.8<br>I22.9 I46 I46.0 I46.1 I46.9 I95.2 I95.8 I95.9 R57.0 R57.1 R57.2<br>R57.9 T88.2 T81.1 T79.4 R00.0 R00.1 R00.3 P29.0 P29.1<br>P29.4 P29.8 P29.9                           |
| <b>Neurological dysfunction</b>   | I63 I63.0 I63.1 I63.2 I63.3 I63.4 I63.5 I63.6 I63.8 I63.9 I64<br>G93.1 G93.4 G93.6 F05.0 F05.8 F05.9 R40 R40.0 R40.1<br>R40.2P91.0 P91.4 P91.5 P91.6 P91.8 P91.9                                                                         |
| <b>Renal dysfunction</b>          | N17 N17.0 N17.1 N17.2 N17.8 N17.9 N19 N99.0 R34                                                                                                                                                                                          |
| <b>Respiratory dysfunction</b>    | J12 J12.0 J12.1 J12.2 J12.3 J12.8 J12.9 J13 J14 J15 J15.0 J15.1<br>J15.2 J15.3 J15.4 J15.5 J15.6 J15.7 J15.8 J15.9 J16 J16.0 J16.8<br>J18 J18.0 J18.1 J18.2 J18.8 J18.9 J96.0 J96.9 J95.1 J95.2 P28.5<br>J80 P22 P22.0 P22.1 P22.8 P22.9 |
| <b>Sepsis / SIRS</b>              | A40 A40.0 A40.1 A40.2 A40.3 A40.8 A40.9 A41 A41.0 A41.1<br>A41.2 A41.3 A41.4 A41.51 A41.52 A41.8 A41.9 A42.7 B00.7<br>B37.7 R65 R65.0 R65.1 R65.2 R65.3 R65.9 P36                                                                        |
| <b>Hepatic dysfunction</b>        | K72.0 K72.7 K72.9                                                                                                                                                                                                                        |
